# Supplementary material for: Community characteristics associated with where urgent care centers are located: a cross-sectional analysis
Source: PubMed Central journal article supplement — BMJ Open. 2016 Apr 1;6(4):e010663. doi: 10.1136/bmjopen-2015-010663 (PMC4838716; doi:10.1136/bmjopen-2015-010663), 2016-04-01
Supplement: bmjopen-2015-010663supp.pdf [file bmjopen-2015-010663supp.pdf]

**Appendix Table 1.** Poisson Regression on Number of Non-Hospital-Based Urgent Care Centers Within Community

|                               |                                   | <b>Rate Ratio</b> | <b>95% CI</b> | <b>P-Value</b> |
|-------------------------------|-----------------------------------|-------------------|---------------|----------------|
| RUCA                          | Urban                             | --                | --            | --             |
|                               | Suburban                          | 0.20              | (0.18, 0.22)  | 0.000          |
|                               | Large Rural Town                  | 0.39              | (0.36, 0.43)  | 0.000          |
|                               | Small Town or Isolated Rural Area | 0.09              | (0.08, 0.10)  | 0.000          |
| Health Provider Shortage Area | Not designated HPSA               | --                | --            | --             |
|                               | Part of county designated HPSA    | 0.94              | (0.87, 1.02)  | 0.137          |
|                               | Whole county designated HPSA      | 0.93              | (0.86, 1.01)  | 0.069          |
| Income                        | Lowest Quartile                   | --                | --            | --             |
|                               | Quartile 2                        | 1.25              | (1.15, 1.37)  | 0.000          |
|                               | Quartile 3                        | 1.23              | (1.12, 1.35)  | 0.000          |
|                               | Highest Quartile                  | 1.21              | (1.10, 1.34)  | 0.000          |
| Private Health Insurance      | Lowest Quartile                   | --                | --            | --             |
|                               | Quartile 2                        | 1.37              | (1.26, 1.49)  | 0.000          |
|                               | Quartile 3                        | 1.51              | (1.38, 1.66)  | 0.000          |
|                               | Highest Quartile                  | 1.28              | (1.15, 1.42)  | 0.000          |
| Minority                      | Lowest Quartile                   | --                | --            | --             |
|                               | Quartile 2                        | 4.56              | (3.81, 5.47)  | 0.000          |
|                               | Quartile 3                        | 8.67              | (7.27, 10.35) | 0.000          |
|                               | Highest Quartile                  | 9.00              | (7.51, 10.78) | 0.000          |
| Older than 65                 | Lowest Quartile                   | --                | --            | --             |
|                               | Quartile 2                        | 0.93              | (0.87, 0.99)  | 0.018          |
|                               | Quartile 3                        | 1.02              | (0.96, 1.10)  | 0.508          |
|                               | Highest Quartile                  | 0.95              | (0.87, 1.03)  | 0.211          |
| Constant                      |                                   | 0.05              | (0.04, 0.07)  | 0.000          |

**Appendix Table 2.** Poisson Regression on Number of Urgent Care Centers Within Community

|                               |                                   | <b>Rate Ratio</b> | <b>95% CI</b> | <b>P-Value</b> |
|-------------------------------|-----------------------------------|-------------------|---------------|----------------|
| RUCA                          | Urban                             | --                | --            | --             |
|                               | Suburban                          | 0.19              | (0.17, 0.20)  | 0.000          |
|                               | Large Rural Town                  | 0.43              | (0.39, 0.46)  | 0.000          |
|                               | Small Town or Isolated Rural Area | 0.12              | (0.11, 0.13)  | 0.000          |
| Health Provider Shortage Area | Not designated HPSA               | --                | --            | --             |
|                               | Part of county designated HPSA    | 0.93              | (0.87, 1.00)  | 0.060          |
|                               | Whole county designated HPSA      | 0.91              | (0.85, 0.97)  | 0.006          |
| Income                        | Lowest Quartile                   | --                | --            | --             |
|                               | Quartile 2                        | 1.19              | (1.10, 1.29)  | 0.000          |
|                               | Quartile 3                        | 1.10              | (1.01, 1.19)  | 0.029          |
|                               | Highest Quartile                  | 1.03              | (0.94, 1.13)  | 0.535          |
| Private Health Insurance      | Lowest Quartile                   | --                | --            | --             |
|                               | Quartile 2                        | 1.44              | (1.33, 1.55)  | 0.000          |
|                               | Quartile 3                        | 1.64              | (1.50, 1.78)  | 0.000          |
|                               | Highest Quartile                  | 1.36              | (1.23, 1.50)  | 0.000          |
| Minority                      | Lowest Quartile                   | --                | --            | --             |
|                               | Quartile 2                        | 4.34              | (3.73, 5.06)  | 0.000          |
|                               | Quartile 3                        | 7.58              | (6.53, 8.80)  | 0.000          |
|                               | Highest Quartile                  | 7.87              | (6.75, 9.17)  | 0.000          |
| Older than 65                 | Lowest Quartile                   | --                | --            | --             |
|                               | Quartile 2                        | 0.95              | (0.89, 1.00)  | 0.054          |
|                               | Quartile 3                        | 1.08              | (1.01, 1.14)  | 0.022          |
|                               | Highest Quartile                  | 0.94              | (0.87, 1.01)  | 0.094          |
| Constant                      |                                   | 0.07              | (0.06, 0.09)  | 0.000          |

**Appendix Table 3.** Comparison of Communities With and Without Any Urgent Care Center

|                                     |                                   | <b>Communities without<br/>UCCs</b> | <b>Communities with<br/>UCCs</b>  | <b>Total</b>   |
|-------------------------------------|-----------------------------------|-------------------------------------|-----------------------------------|----------------|
| Number of Communities               |                                   | 25,869                              | 5,153                             | 31,022         |
| Number of Urgent Care Centers       |                                   | 0                                   | 8,119                             | 8,119          |
| Total Population 2010, in thousands |                                   | 15,645                              | 14,419                            | 30,064         |
|                                     |                                   | <i>No. of Communities<br/>(%)</i>   | <i>No. of Communities<br/>(%)</i> | <i>P-Value</i> |
| RUCA                                | Urban                             | 5,593 (21.6%)                       | 3,780 (73.4%)                     | 0.000          |
|                                     | Suburban                          | 5,421 (21.0%)                       | 374 (7.3%)                        |                |
|                                     | Large Rural Town                  | 3,910 (15.1%)                       | 552 (10.7%)                       |                |
|                                     | Small Town or Isolated Rural Area | 10,945 (42.3%)                      | 447 (8.7%)                        |                |
| Health Provider Shortage Area       | Not designated HPSA               | 3,552 (13.7%)                       | 674 (13.1%)                       | 0.021          |
|                                     | Part of county designated HPSA    | 11,326 (43.8%)                      | 2,182 (42.3%)                     |                |
|                                     | Whole county designated HPSA      | 10,990 (42.5%)                      | 2,297 (44.6%)                     |                |
| Income                              | Lowest Quartile                   | 6,798 (26.3%)                       | 882 (17.1%)                       | 0.000          |
|                                     | Quartile 2                        | 6,563 (25.4%)                       | 1,114 (21.6%)                     |                |
|                                     | Quartile 3                        | 6,428 (24.8%)                       | 1,251 (24.3%)                     |                |
|                                     | Highest Quartile                  | 5,777 (22.3%)                       | 1,901 (36.9%)                     |                |
| Private Health Insurance            | Lowest Quartile                   | 6,723 (26.0%)                       | 1,009 (19.6%)                     | 0.000          |
|                                     | Quartile 2                        | 6,474 (25.0%)                       | 1,279 (24.8%)                     |                |
|                                     | Quartile 3                        | 6,389 (24.7%)                       | 1,379 (26.8%)                     |                |
|                                     | Highest Quartile                  | 6,181 (23.9%)                       | 1,483 (28.8%)                     |                |
| Minority                            | Lowest Quartile                   | 7,780 (30.1%)                       | 175 (3.4%)                        | 0.000          |
|                                     | Quartile 2                        | 6,800 (26.3%)                       | 828 (16.1%)                       |                |
|                                     | Quartile 3                        | 5,727 (22.1%)                       | 1,972 (38.3%)                     |                |
|                                     | Highest Quartile                  | 5,560 (21.5%)                       | 2,178 (42.3%)                     |                |
| Elderly                             | Lowest Quartile                   | 5,792 (22.4%)                       | 2,036 (39.5%)                     | 0.000          |
|                                     | Quartile 2                        | 6,491 (25.1%)                       | 1,322 (25.7%)                     |                |
|                                     | Quartile 3                        | 6,580 (25.4%)                       | 1,065 (20.7%)                     |                |
|                                     | Highest Quartile                  | 7,004 (27.1%)                       | 730 (14.2%)                       |                |
| Average Population                  |                                   | 605                                 | 2,798                             | 0.000          |

**Appendix Table 4.** Logistic Regression on Likelihood of Presence of Any Urgent Care Center Within Community

|                               |                                   | <b>Odds Ratio</b> | <b>95% CI</b> | <b>P-Value</b> |
|-------------------------------|-----------------------------------|-------------------|---------------|----------------|
| RUCA                          | Urban                             | reference         |               |                |
|                               | Suburban                          | 0.15              | (0.13, 0.17)  | 0.000          |
|                               | Large Rural Town                  | 0.31              | (0.28, 0.35)  | 0.000          |
|                               | Small Town or Isolated Rural Area | 0.10              | (0.09, 0.11)  | 0.000          |
| Health Provider Shortage Area | Not designated HPSA               | reference         |               |                |
|                               | Part of county designated HPSA    | 0.90              | (0.81, 1.01)  | 0.073          |
|                               | Whole county designated HPSA      | 0.86              | (0.77, 0.96)  | 0.005          |
| Income                        | Lowest Quartile                   | reference         |               |                |
|                               | Quartile 2                        | 1.27              | (1.13, 1.42)  | 0.000          |
|                               | Quartile 3                        | 1.20              | (1.06, 1.35)  | 0.004          |
|                               | Highest Quartile                  | 1.06              | (0.92, 1.21)  | 0.432          |
| Private Health Insurance      | Lowest Quartile                   | reference         |               |                |
|                               | Quartile 2                        | 1.58              | (1.42, 1.77)  | 0.000          |
|                               | Quartile 3                        | 1.82              | (1.60, 2.07)  | 0.000          |
|                               | Highest Quartile                  | 1.54              | (1.33, 1.78)  | 0.000          |
| Minority                      | Lowest Quartile                   | reference         |               |                |
|                               | Quartile 2                        | 3.80              | (3.20, 4.51)  | 0.000          |
|                               | Quartile 3                        | 7.36              | (6.23, 8.69)  | 0.000          |
|                               | Highest Quartile                  | 8.07              | (6.78, 9.62)  | 0.000          |
| Older than 65                 | Lowest Quartile                   | reference         |               |                |
|                               | Quartile 2                        | 0.93              | (0.85, 1.01)  | 0.100          |
|                               | Quartile 3                        | 1.06              | (0.96, 1.17)  | 0.216          |
|                               | Highest Quartile                  | 0.96              | (0.85, 1.07)  | 0.436          |
| Constant                      |                                   | 0.07              | (0.06, 0.09)  | 0.000          |
